# Supplementary material for: Xenotransplantation of interferon-gamma-pretreated clumps of a human mesenchymal stem cell/extracellular matrix complex induces mouse calvarial bone regeneration
Source: PubMed Central journal article supplement (PMC5406942; doi:10.1186/s13287-017-0550-1), 2017-04-26
Supplement: 13287_2017_550_MOESM1_ESM.pdf [file 13287_2017_550_MOESM1_ESM.pdf]

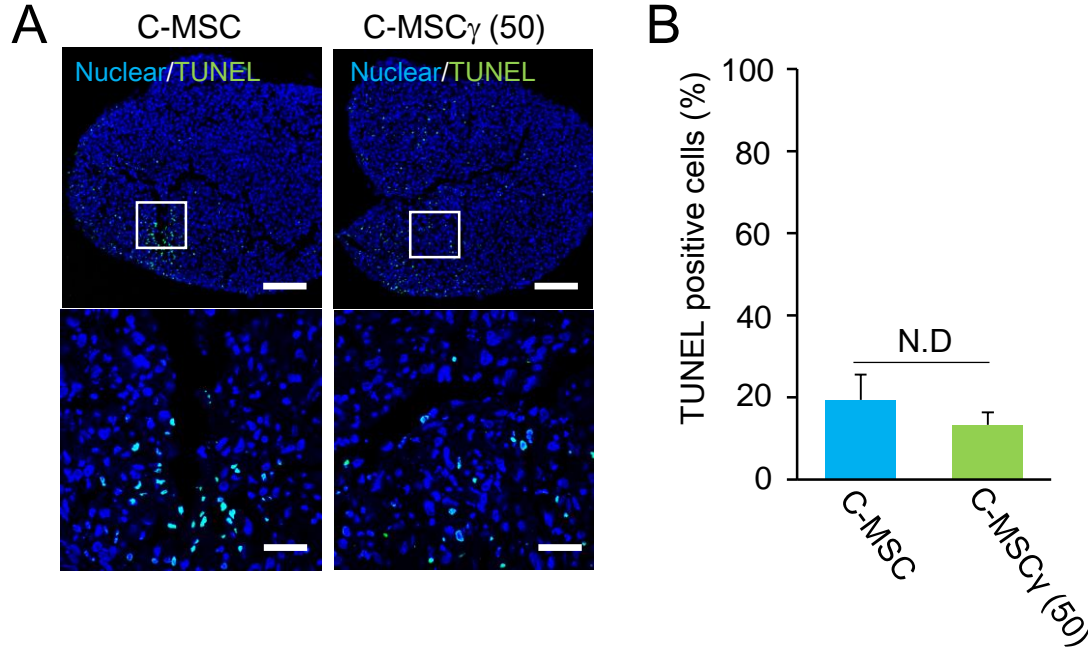

*Supplemental Fig. 1 Cell viability in C-MSC and C-MSC $\gamma$*

TUNEL staining for apoptotic cells was performed using the DeadEnd™ Fluorometric TUNEL System (Promega). (A) Confocal immunofluorescence images of TUNEL (green) and nuclei (blue) in C-MSC or C-MSC $\gamma$ . Upper panel shows lower magnification (bar=200  $\mu$ m) and the lower panels indicates higher magnification (bar=50  $\mu$ m) (B) The graphs show the percentage of TUNEL-positive apoptotic cells. Values represent means  $\pm$  S.D. of three cultured C-MSCs. Similar results were obtained from three independent experiments. C-MSC: Cultured in growth medium for 3 days. C-MSC $\gamma$  (50): C-MSC stimulated with 50 ng/mL of IFN- $\gamma$  for 24 h.

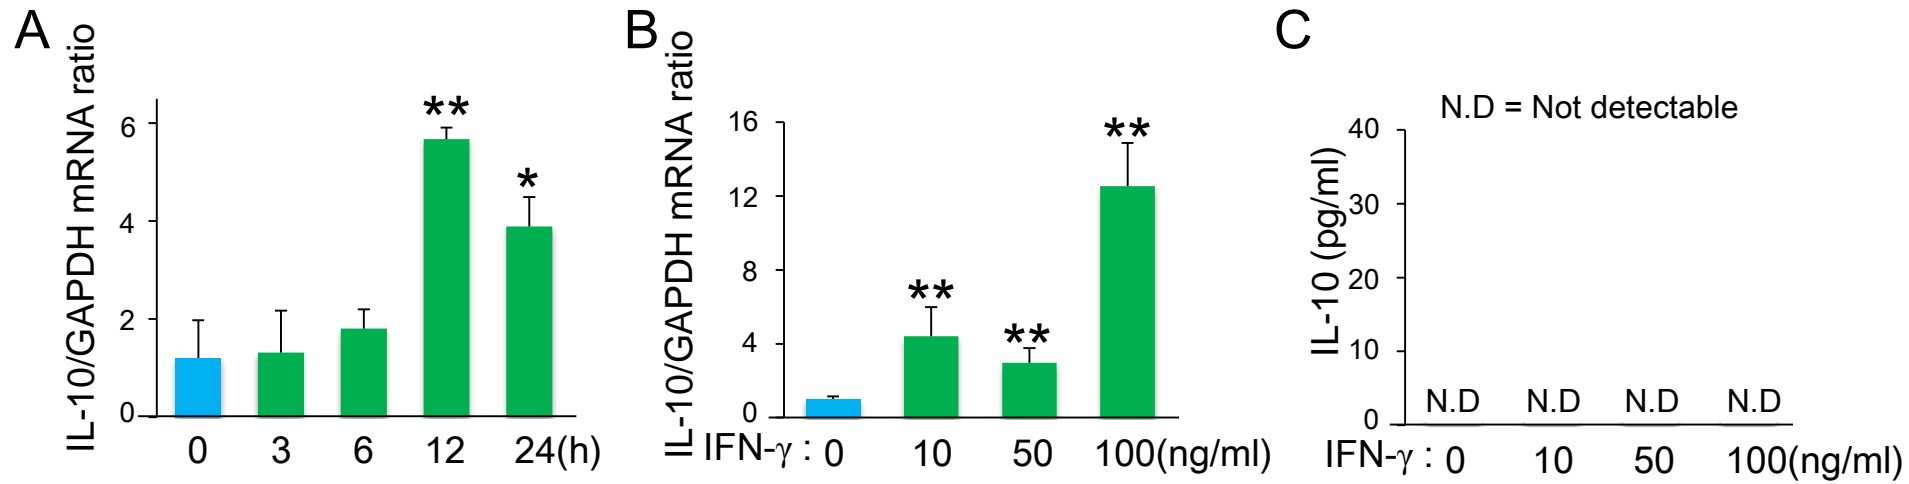

*Supplemental Fig. 2 IFN- $\gamma$  increased IL-10 mRNA expression, but not its protein production in C-MSC*

(A) Time course study. C-MSCs were exposed to IFN- $\gamma$  (10 ng/ml) for the indicated time. (B and C) Dose course study. C-MSCs were treated with or without various doses of IFN- $\gamma$  (10, 50, 100 ng/ml) for 24 hr. (A and B) IL-10 mRNA expression level was evaluated by real-time PCR as described in the Materials and Methods section. Sequence of primers for IL-10 were 5'-TCAAACCTCACTCATGGCTTTGT-3' (forward) and 5'-GCTGTCATCGATTTCTTCCC-3' (reverse). The plot shows the ratio of *IL-10* mRNA to *GAPDH* mRNA. Values represent means  $\pm$  S.D. of four cultures. (C) The IL-10 protein production in culture supernatant was measured by IL-10 ELISA kit (Peprotech) following the manufacturer's instruction. Data are the means  $\pm$  S.D. of four cultures.
